# Supplementary material
Source: Springer Nature journal article supplement (https://www.springermedizin.de/resource/supplementary/12936_2014_3159_MOESM2_ESM.pdf/9545230)

## A. *In vivo* therapeutic efficacy study

### Sample collection and treatment:

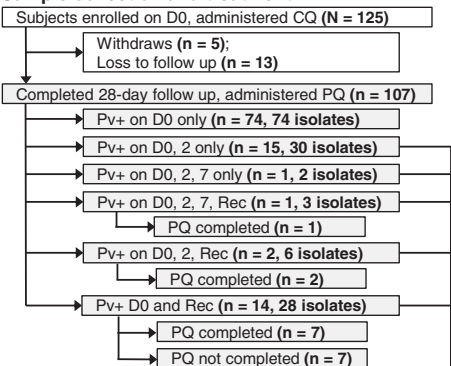

### Genotype processing:

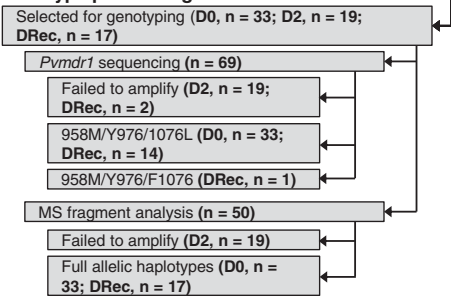

## B. *In vitro* drug assay

### Sample collection and treatment:

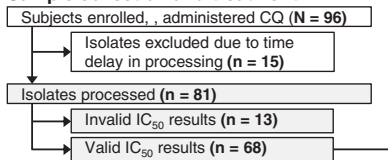

### Genotype processing:

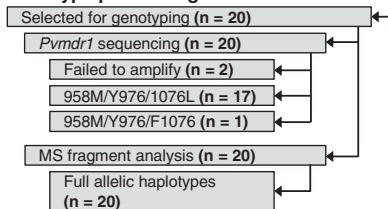

Supplement: MOESM2 [file 9545230]
